# Supplementary material for: On Structural and Molecular Order in Cellulose Acetate Butyrate Films
Source: MDPI journal article supplement (doi:10.3390/polym15092205), 2023-05-06
Supplement: s1 [file s1]

# Supplemental to: On structural and molecular order in cellulose acetate butyrate films

A schematic presentation of the film making procedure is found in Figure S1.

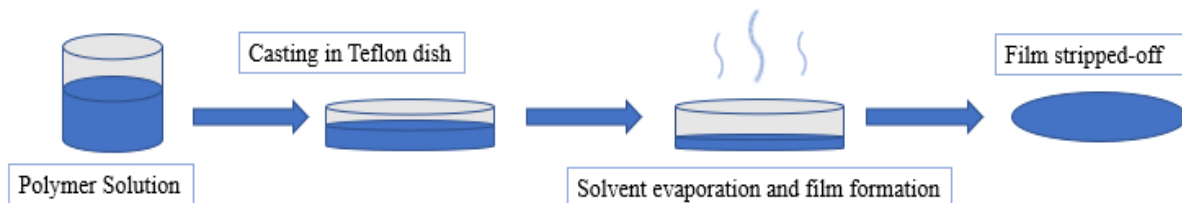

Figure S1. The solvent casting method for polymer film production.

FT-IR spectra of CAB-171-15 and CAB-551-0.01, the lowest and the highest butyrate substituted samples respectively, are found in Figure S2.

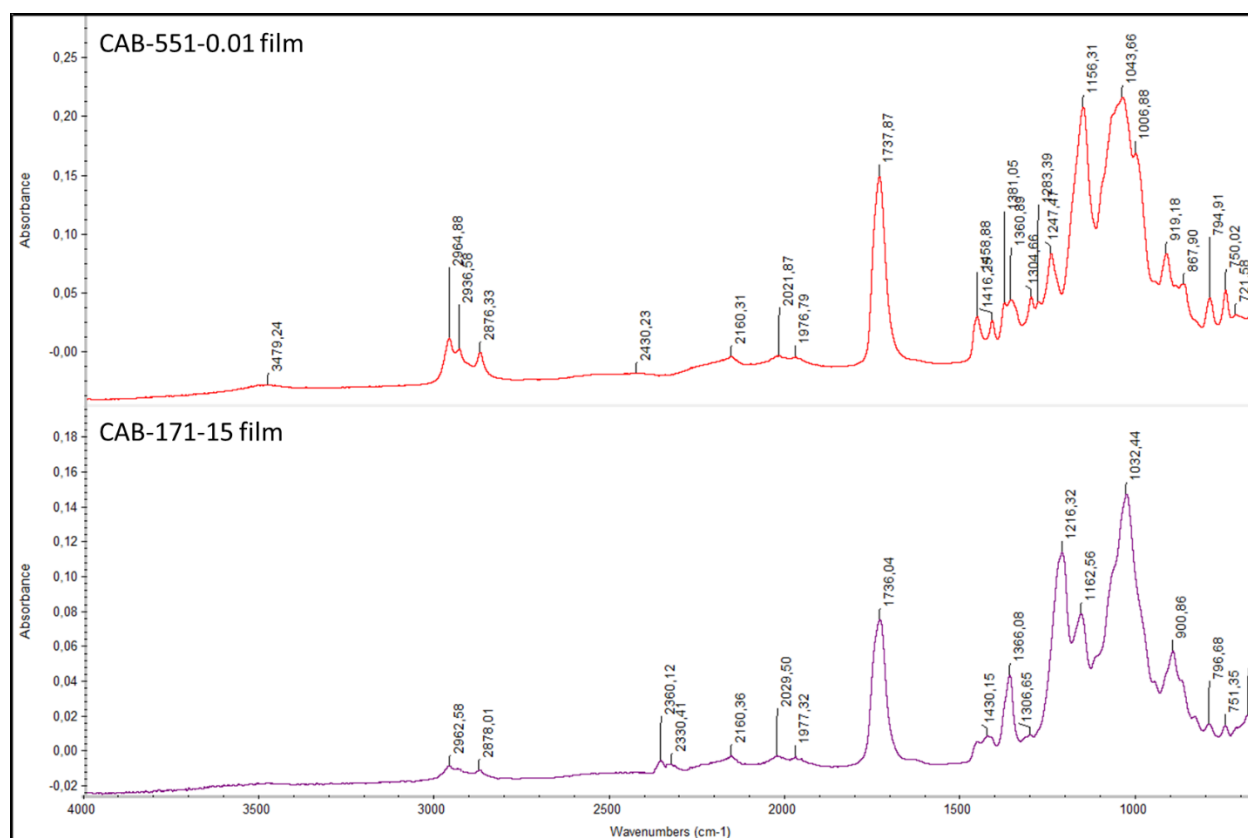

Figure S2. FT-IR spectra of CAB-171-15 and CAB-551-0.01, the lowest and the highest butyrate substituted samples respectively.
